# Supplementary material for: Triclosan and triclocarban exposure, infectious disease symptoms and antibiotic prescription in infants—A community-based randomized intervention
Source: PubMed Central journal article supplement (PMC6023107; doi:10.1371/journal.pone.0199298), 2018-06-28
Supplement: pone.0199298.s001.pdf [file pone.0199298.s001.pdf]

**S1 Table: Maternal and household characteristics at enrollment, by intervention group (mITT cohort)**

|                                       | <b>TC Arm<br/>(n=60)</b> | <b>Non-TC Arm<br/>(n=73)</b> | <b>Total<br/>(n=133)</b> |
|---------------------------------------|--------------------------|------------------------------|--------------------------|
| First-born child                      | 20 (33%)                 | 21 (29%)                     | 41 (31%)                 |
| Maternal age at enrollment (years)    |                          |                              |                          |
| [mean (SD)]                           | 30 (5.6)                 | 31 (6.1)                     | 31 (5.9)                 |
| [median (IQR)]                        | 32 (26-35)               | 31 (28-35)                   | 31 (27-35)               |
| Maternal race/ethnicity               |                          |                              |                          |
| Hispanic                              | 38 (63%)                 | 43 (59%)                     | 81 (61%)                 |
| White non-Hispanic                    | 10 (17%)                 | 12 (16%)                     | 22 (17%)                 |
| Black non-Hispanic                    | 4 (7%)                   | 3 (4%)                       | 7 (5%)                   |
| Asian                                 | 6 (10%)                  | 12 (16%)                     | 18 (14%)                 |
| Not specified                         | 2 (3%)                   | 3 (4%)                       | 5 (4%)                   |
| Maternal country of birth             |                          |                              |                          |
| U.S.                                  | 21 (35%)                 | 32 (44%)                     | 53 (40%)                 |
| Other                                 | 39 (65%)                 | 41 (56%)                     | 80 (60%)                 |
| Maternal education level              |                          |                              |                          |
| Less than high school                 | 19 (32%)                 | 21 (29%)                     | 40 (30%)                 |
| High school                           | 12 (20%)                 | 13 (18%)                     | 25 (19%)                 |
| Some college                          | 20 (33%)                 | 17 (23%)                     | 37 (28%)                 |
| Post college                          | 9 (15%)                  | 22 (30%)                     | 31 (23%)                 |
| Household size: median (IQR)          | 4 (3-6)                  | 4 (3-6)                      | 4 (3-6)                  |
| Household with minors (age <18 years) | 47 (78%)                 | 55 (75%)                     | 102 (77%)                |
| Minors in household at enrollment     |                          |                              |                          |
| [mean (SD)]                           | 2.1 (1.3)                | 1.9 (1.1)                    | 2.0 (1.2)                |
| [median (IQR)]                        | 2 (1-3)                  | 2 (1-2)                      | 2 (1-5)                  |

|                                                         | <b>TC Arm<br/>(n=60)</b> | <b>Non-TC Arm<br/>(n=73)</b> | <b>Total<br/>(n=133)</b> |
|---------------------------------------------------------|--------------------------|------------------------------|--------------------------|
| Household cleanliness score <sup>a</sup> [median (IQR)] | 4 (1-5)                  | 4 (1-5)                      | 4 (1-5)                  |
| Crowding (people/room) at enrollment                    |                          |                              |                          |
| [mean (SD)]                                             | 1.6 (1.0)                | 1.3 (0.8)                    | 1.4 (0.9)                |
| [median (IQR)]                                          | 1.2 (0.8-2.1)            | 1.2 (0.8-1.5)                | 1.2 (0.8-1.8)            |
| Use of cleaning products or chemicals at work           |                          |                              |                          |
| Yes                                                     | 15 (25%)                 | 18 (25%)                     | 33 (25%)                 |
| No                                                      | 25 (42%)                 | 28 (38%)                     | 53 (40%)                 |
| Not applicable                                          | 20 (33%)                 | 27 (37%)                     | 47 (35%)                 |
| Bathing habits                                          |                          |                              |                          |
| Daily                                                   | 45 (75%)                 | 53 (73%)                     | 98 (74%)                 |
| More than once per day                                  | 7 (12%)                  | 12 (16%)                     | 19 (14%)                 |
| Every other day                                         | 8 (13%)                  | 8 (11%)                      | 16 (12%)                 |

mITT: modified intent to treat; IQR: interquartile range; SD; standard deviation; TC: triclosan/triclocarban

<sup>a</sup> Household cleanliness score (0–10), where 0=very clean; assessed by interviewer.
