# Supplementary material for: Triclosan and triclocarban exposure, infectious disease symptoms and antibiotic prescription in infants—A community-based randomized intervention
Source: PubMed Central journal article supplement (PMC6023107; doi:10.1371/journal.pone.0199298), 2018-06-28
Supplement: pone.0199298.s008.pdf [file pone.0199298.s008.pdf]

May 16, 2018

## Analytic Datasets

**Manuscript Title:** Triclosan and triclocarban exposure, infectious disease symptoms and antibiotic prescription in infants – a community-based randomized intervention

**Corresponding Author:** Catherine Ley

There are 4 analytic datasets used for the results presented in this manuscript. All datasets are in .CSV format.

There is an excel spreadsheet titled 'S2\_File2' which includes a data dictionary for each of the datasets listed below. The datasets are:

- 1) S2\_File  
Contains subject-level data for all subjects participating in the randomized controlled trial. Includes variables for flags for inclusion in the mITT cohort and mPP cohort.
- 2) S3\_File  
Contains survey-level data for mITT cohort for primary outcome analysis (has infection)
- 3) S4\_File  
Contains survey-level data for mPP cohort for primary outcome analysis (has infection)
- 4) S5\_File  
Contains visit-level data for antibiotic prescriptions based on medical record reviews
